# Supplementary material for: Syntheses, characterizations and properties of five new metal–organic complexes based on flexible ligand 4,4′-(phenylazanediyl)dibenzoic acid
Source: Royal Society of Chemistry journal article supplement (doi:10.1039/c2ce26521d), 2012-11-01
Supplement: c2ce26521d.pdf [file c2ce26521d.pdf]

## Syntheses, characterizations and properties of five new metal-organic complexes based on flexible ligand 4,4'-(phenylazanediyl) dibenzoic acid

Jianliang Zhou<sup>†,\*</sup>, Yuanyuan Wang<sup>†</sup>, Ling Qin,<sup>‡</sup> Mingdao Zhang,<sup>‡</sup> Qinxiang Yang,<sup>‡</sup>  
Hegen Zheng<sup>†,\*</sup>

<sup>†</sup>*School of Chemistry and Chemical Engineering, Central South University, Changsha, 410083, China.*

<sup>‡</sup>*State Key Laboratory of Coordination Chemistry, School of Chemistry and Chemical Engineering, Nanjing National Laboratory of Microstructures, Nanjing University, Nanjing 210093, P. R. China.*

**Table S1.** Selected Bond Lengths (Å) and Angles (deg) for Compounds **1-5**.

| Compound 1      |            |                |            |
|-----------------|------------|----------------|------------|
| Zn1-N2          | 2.001(2)   | Zn1-O1         | 1.975(2)   |
| Zn1-O2#1        | 1.983(2)   | Zn1-O3#2       | 1.939(1)   |
| N2-Zn1- O1      | 108.79(7)  | N2-Zn1- O2#1   | 101.70(7)  |
| N2-Zn1-O3#2     | 113.69(7)  | O1-Zn1- O2#1   | 117.01(7)  |
| O1-Zn1- O3#2    | 107.99(6)  | O2#1-Zn1- O3#2 | 107.78(6)  |
| Compound 2      |            |                |            |
| Co1-N3          | 2.1805(19) | Co1-O1         | 2.0606(15) |
| Co1-O2#1        | 2.0195(16) | Co1-N1         | 2.1761(19) |
| Co1-O6#2        | 2.2023(15) | Co1-O5#2       | 2.1928(15) |
| O5#2- Co1- O6#2 | 59.766(5)  | O5#2- Co1- N1  | 91.490(5)  |

|                   |             |                |             |
|-------------------|-------------|----------------|-------------|
| O5#2- Co1- O2#1   | 152.625(6)  | O5#2- Co1- O1  | 91.084(7)   |
| O5#4- Co1-N3      | 88.775(7)   | O6#2-Co1- N1   | 86.59(6)    |
| O6#2-Co1- O2#1    | 94.163(6)   | O6#2-Co1- O1   | 150.621(6)  |
| O6#2-Co1-N3       | 95.296(6)   | N1- Co1- O2#1  | 94.610(6)   |
| N1- Co1- O1       | 92.573 (6)  | N1- Co1-N3     | 179.523(7)  |
| O2#1- Co1-O1      | 115.212 (6) | O2#1- Co1-N3   | 85.332(6)   |
| O1- Co1-N3        | 87.052(6)   |                |             |
| <b>Compound 3</b> |             |                |             |
| Cd1-N2            | 2.3298 (1)  | Cd1-O2         | 2.3368 (8)  |
| Cd1-O1            | 2.4019 (1)  | Cd1- N3#2      | 2.3411 (1)  |
| Cd1-O3#3          | 2.3127(9)   | Cd1- O3#4      | 2.5463(8)   |
| Cd1- O4#4         | 2.3496(9)   | N2-Cd1- O2     | 90.575(2)   |
| N2-Cd1-O1         | 83.788(3)   | N2-Cd1- N3#2   | 175.325(4)  |
| N2-Cd1- O3#3      | 91.673 (3)  | N2-Cd1- O3#4   | 83.859(3)   |
| N2-Cd1- O4#4      | 98.480(3)   | O2-Cd1- O1     | 54.875(3)   |
| O2-Cd1- N3#2      | 90.725(3)   | O2-Cd1-O3#3    | 150.084(3)  |
| O2-Cd1- O3#4      | 135.087 (3) | O2-Cd1- O4#4   | 84.667(3)   |
| O1-Cd1- N3#2      | 93.297(3)   | O1-Cd1- O3#3   | 95.754(3)   |
| O1-Cd1- O3#4      | 164.186(3)  | O1-Cd1- O4#4   | 139.540(3)  |
| N3#2-Cd1- O3#3    | 84.970(3)   | N3#2-Cd1- O3#4 | 98.355(3)   |
| N3#2-Cd1- O4#4    | 86.112(3)   | O3#3-Cd1- O3#4 | 74.784(3)   |
| O3#3-Cd1- O4#4    | 124.385(3)  | O3#4-Cd1- O4#4 | 52.564(3)   |
| <b>Compound 4</b> |             |                |             |
| Zn1-N2            | 2.0940(5)   | Zn1-O4#1       | 1.9563(5)   |
| Zn1-N5#2          | 2.0110(5)   | Zn1-O1         | 1.9443(4)   |
| N2-Zn1- O4#1      | 93.271(2)   | N2-Zn1- O1     | 103.881(17) |

|                   |             |                 |            |
|-------------------|-------------|-----------------|------------|
| N2-Zn1- N5#2      | 102.209(18) | O4#1-Zn1- O1    | 108.020(2) |
| O4#1-Zn1- N5#2    | 119.172(2)  | O1-Zn1- N5#2    | 123.87(17) |
| <b>Compound 5</b> |             |                 |            |
| Co1-N1            | 2.0626(2)   | Co1-O2#1        | 2.0945(2)  |
| Co1-O3#3          | 2.0214(2)   | Co1-Co1#1       | 2.7451(5)  |
| Co1-O1            | 2.044(2)    | Co1-O4#2        | 2.0170(2)  |
| N1-Co1- O2#1      | 93.696(8)   | N1-Co1- O3#3    | 95.256(10) |
| N1-Co1- Co1#1     | 165.99(7)   | N1-Co1- O1      | 100.81(9)  |
| N1-Co1- O4#2      | 99.08(10)   | O2#1-Co1- O3#3  | 89.80(9)   |
| O2#1-Co1- Co1#1   | 73.83(6)    | O2#1-Co1- O1    | 165.49 (8) |
| O2#1-Co1- O4#2    | 86.81(9)    | O3#3-Co1- Co1#1 | 78.68(6)   |
| O3#3-Co1- O1      | 88.42(9)    | O3#3-Co1- O4#2  | 165.46(9)  |
| Co1#1-Co1- O1     | 91.70(6)    | Co1#1-Co1- O4#2 | 86.80(6)   |
| O1-Co1- O4#2      | 91.32(10)   |                 |            |

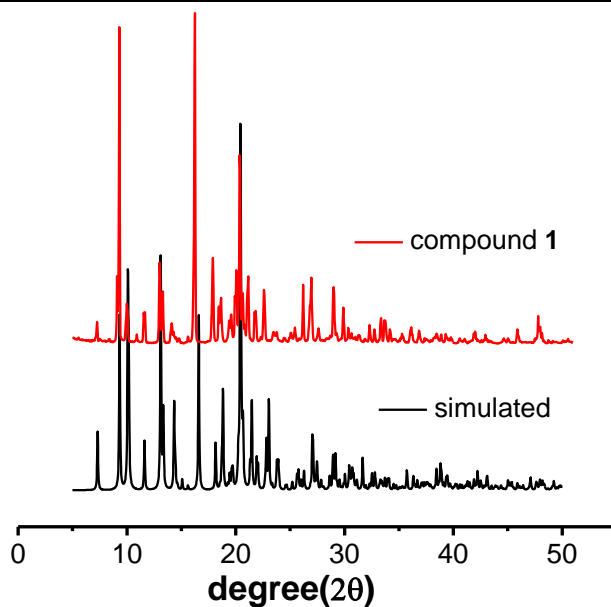

**Figure S1.** Powder X-ray diffraction patterns of complex **1**

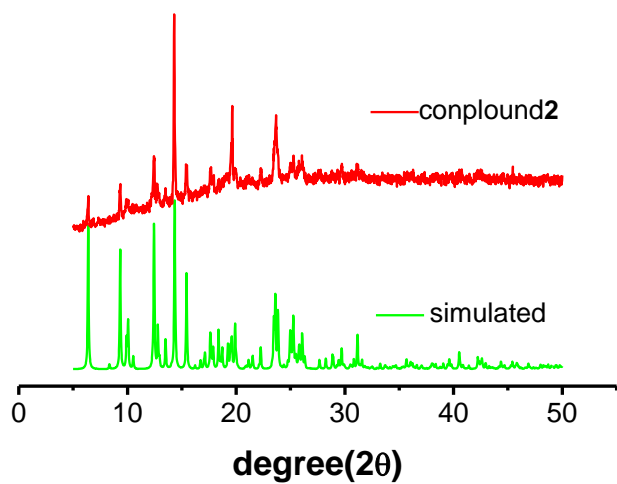

**Figure S2.** Powder X-ray diffraction patterns of complex **2**

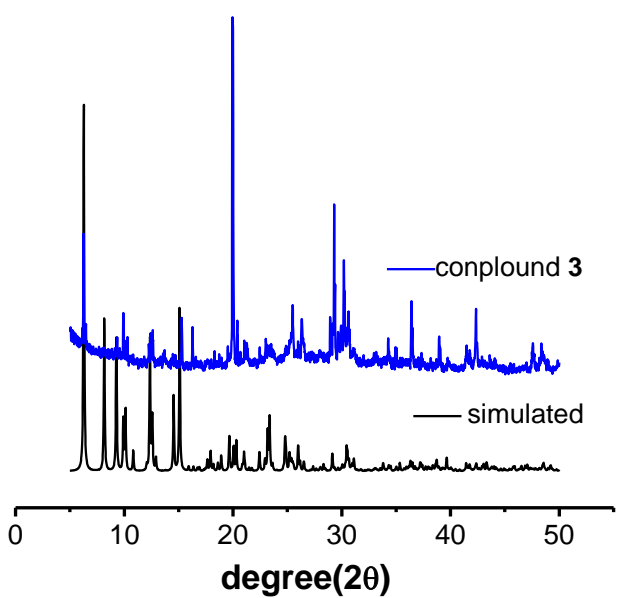

**Figure S3.** Powder X-ray diffraction patterns of complex **3**

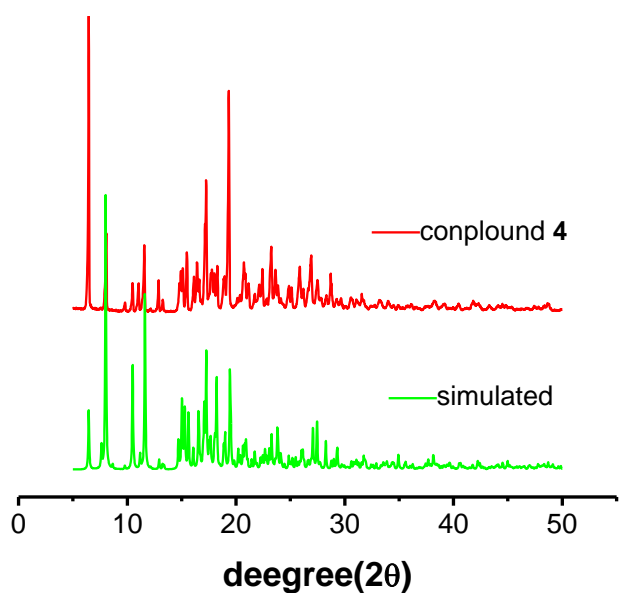

**Figure S4.** Powder X-ray diffraction patterns of complex 4

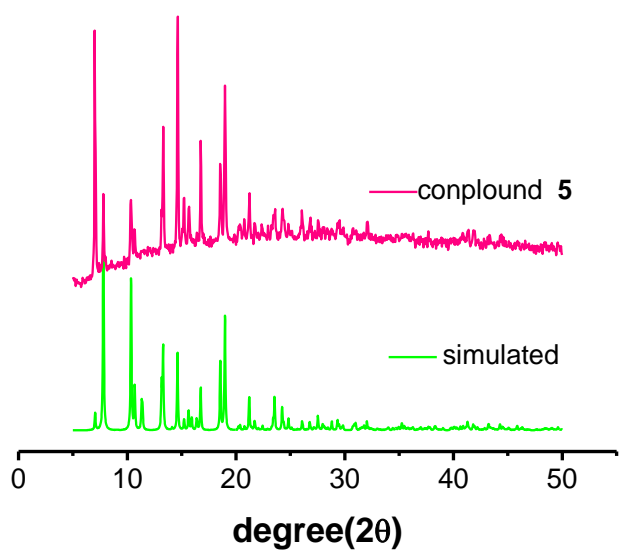

**Figure S5.** Powder X-ray diffraction patterns of complex 5

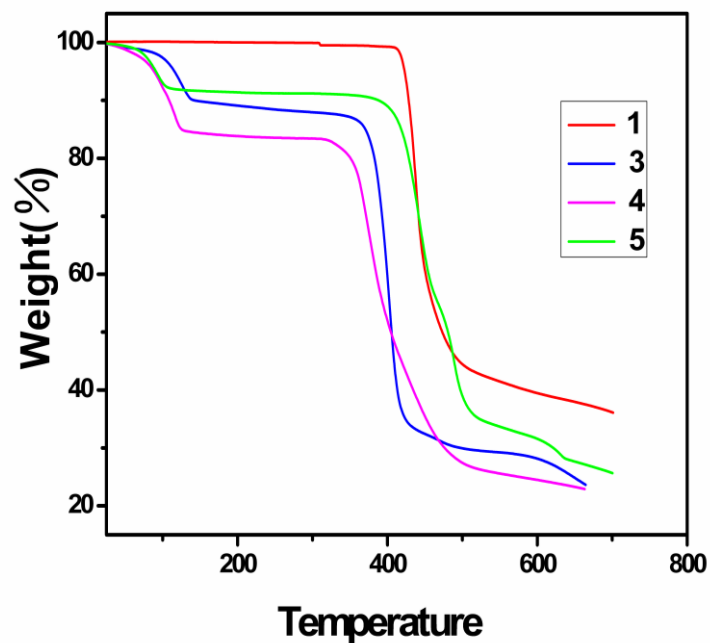

**Figure S6.** The TGA diagrams of complexes 1- 5

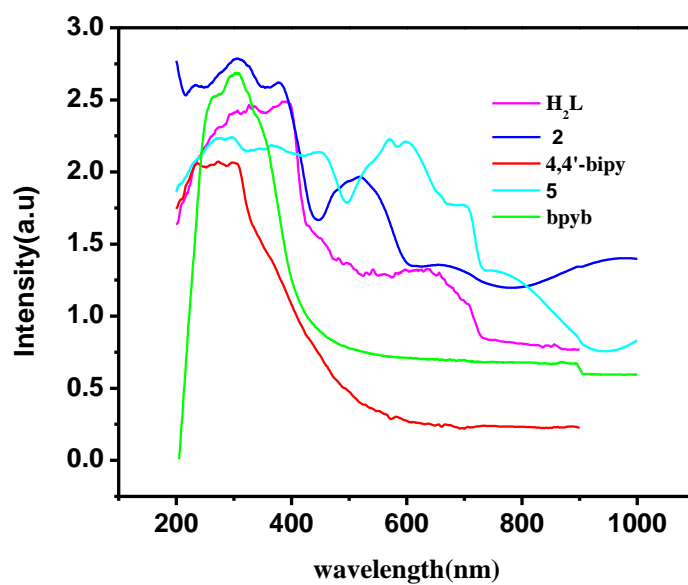

**Figure S7.** Solid-state UV-vis absorption spectra of **2**, **5** and corresponding ligands at room temperature.
